# Supplementary material for: Selective production of methanol by the electrochemical reduction of CO2 on boron-doped diamond electrodes in aqueous ammonia solution
Source: Royal Society of Chemistry journal article supplement (doi:10.1039/c6ra20466j), 2016-01-01
Supplement: c6ra20466j1.pdf [file c6ra20466j1.pdf]

## Supporting Information for

# Selective Production of Methanol by the Electrochemical Reduction of CO<sub>2</sub> on Boron-Doped Diamond Electrodes in Aqueous Ammonia Solution

*Prastika K. Jiwanti<sup>†</sup>, Keisuke Natsui<sup>†</sup>, Kazuya Nakata<sup>‡</sup>, Yasuaki Einaga<sup>\*,†,§</sup>*

<sup>†</sup>Department of Chemistry, Keio University, 3-14-1 Hiyoshi, Yokohama 223-8522, Japan

<sup>‡</sup>Photocatalysis International Research Center, Tokyo University of Science, 2641 Yamazaki,  
Noda, Chiba 278-8510, Japan

<sup>§</sup>ACCEL, Japan Science and Technology Agency, 5-3 Yonbancho, Chiyoda 102-8666, Japan

\*E-mail: [einaga@chem.keio.ac.jp](mailto:einaga@chem.keio.ac.jp)

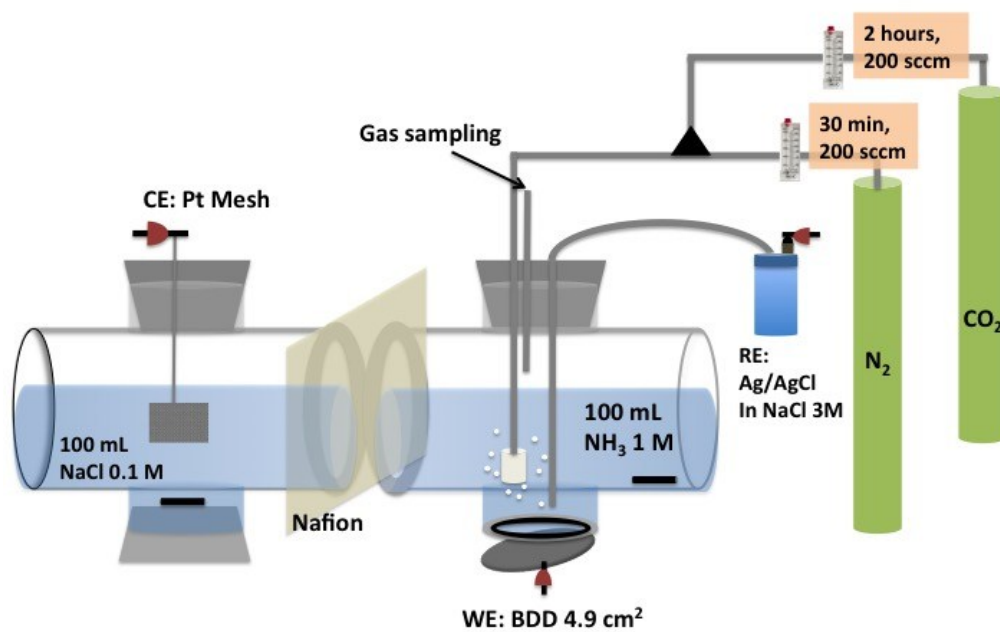

**Figure S1.** The apparatus for electrochemical reduction of  $\text{CO}_2$ .

**Table S1.** CO<sub>2</sub> concentration in the solution depending on the aqueous ammonia concentration (5 minutes CO<sub>2</sub> bubbling in 50-mL solutions).

| Concentration           |                        |
|-------------------------|------------------------|
| NH <sub>3(aq)</sub> (M) | CO <sub>2</sub> (mg/L) |
| 0.001                   | 1520                   |
| 0.01                    | 2580                   |
| 0.1                     | 10380                  |
| 1                       | 67000                  |

**Table S2.** CO<sub>2</sub> absorption in 0.1 M NH<sub>3</sub>, 0.1 M KOH, and 0.1 M NaOH aqueous solutions (15 minutes CO<sub>2</sub> bubbling in 100-mL solutions).

| Electrolyte           | Concentration of CO <sub>2</sub> (mg/L) |
|-----------------------|-----------------------------------------|
| 0.1 M NH <sub>3</sub> | 18400                                   |
| 0.1 M KOH             | 9960                                    |
| 0.1 M NaOH            | 7100                                    |

**Table S3.** A repeatability study on Faradaic efficiencies of methanol production for 2 hours reduction of CO<sub>2</sub> on a BDD electrode in 1 M NH<sub>3</sub> aqueous solution at the potential of -1.3 V (vs. Ag/AgCl).

| Experiments        | Faradaic Efficiency (%) |
|--------------------|-------------------------|
|                    | CH <sub>3</sub> OH      |
| 1                  | 24.29                   |
| 2                  | 27.44                   |
| 3                  | 23.84                   |
| 4                  | 24.47                   |
| Standard deviation | 1.97                    |
